# Supplementary material
Source: publisher figshare collection journal article supplement (https://frontiersin.figshare.com/ndownloader/files/34954347)

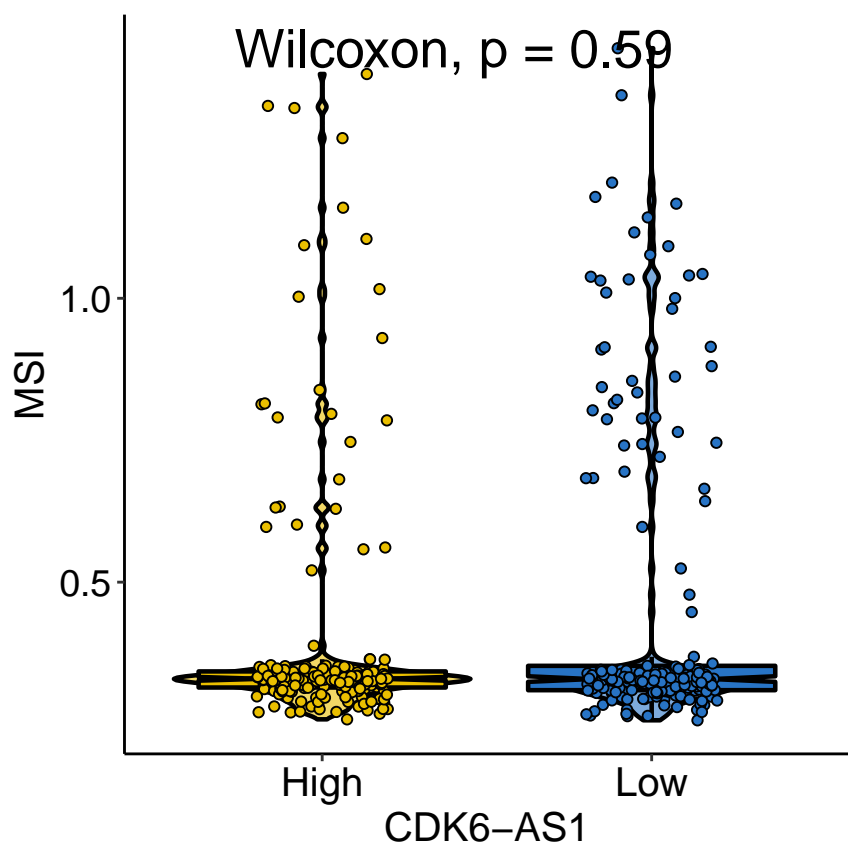

Supplement: Supplementary file [file 34954347]
